# Supplementary material
Source: PubMed Central journal article supplement (PMC8145922)

## SUPPLEMENTARY FIGURE LEGENDS

### **Supplementary Figure 1. Ex vivo activity of MitoPPX and localization in HEK 293 cells.**

**A.** Lysates of Wt and MitoPPX cells were incubated with exogenous polyP. The decrease in polyP levels was monitored using DAPI fluorescence measurements. Incubation with alkaline phosphatase, a known polyP hydrolyzing enzyme was used as control. **B.** Subcellular localization of MitoPPX-GFP. Wt and MitoPPX cells were imaged using a fluorescence microscope. **C.** Confocal images showing co-localization of MitoPPX-GFP and mitochondria in HEK 293 MitoPPX cells. Mitochondria were labeled using TMRM. Data in the graphs are shown as average  $\pm$  SEM.

### **Supplementary Figure 2. Schematic representation of mitochondrial bioenergetics.**

OXPPOS and tricarboxylic acids cycle (TCA) cycle are the main sources of energy within the organelle.

### **Supplementary Figure 3. The respiratory chain is functional in MitoPPX cells.**

explain what you did – use the same lingo as above. Lower concentrations of FCCP (0,25  $\mu$ M) were able to stimulate the mitochondrial respiration and increase the OCR in MitoPPX cells. This evidence proves that the respiratory chain is functional in MitoPPX cells.

### **Supplementary Figure 4. Wt and MitoPPX cells show similar cell density before and after experiments using Seahorse technology.**

Representative images of Wt and MitoPPX cells before and after the experiments with the **A.** Mito Stress and, **B.** Glycolytic Rate Assay.

### **Supplementary Figure 5. Wt and MitoPPX cells show similar levels of mitochondrial Drp1 and of phospho-Drp1 (Ser 616).**

Representative immunoblots showing **A.** levels of Drp1 in mitochondrial and cytosolic fractions prepared from Wt and MitoPPX cells and, **B.** phospho-Drp1 (Ser 616) in cell lysates.  $\beta$  actine was used as a loading control for the cellular extracts and the cytosolic fractions, while TOMM 20 was used as a loading control in the case of the mitochondrial fractions.

## SUPPLEMENTARY TABLE LEGENDS

**Supplementary Table 1: List of all the metabolites analyzed in the Wt and MitoPPX samples.** Table showing all the metabolites analyzed in the samples, organized from higher to lower  $p$  value.

# Supplem. Fig. 1

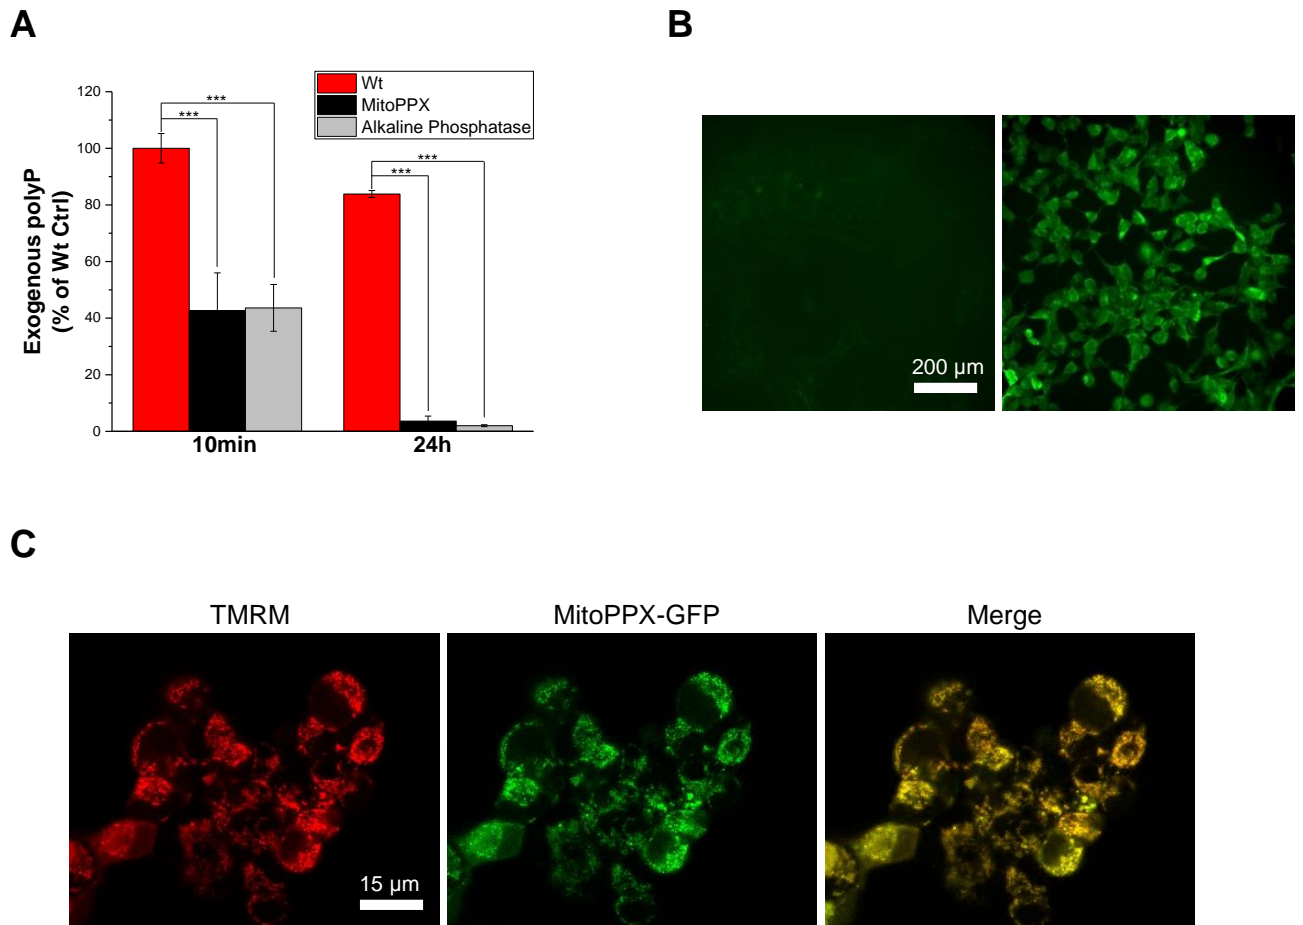

# Supplem. Fig. 2

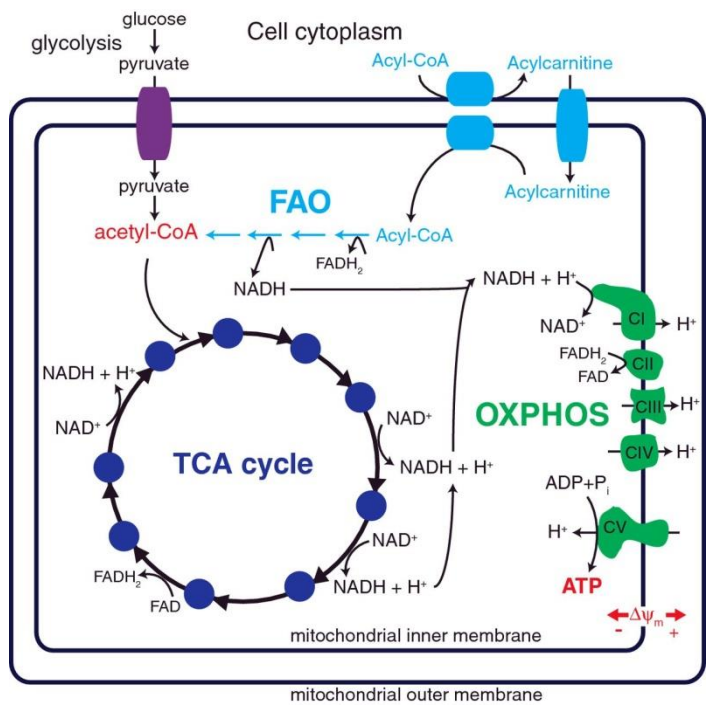

# Supplem. Fig. 3

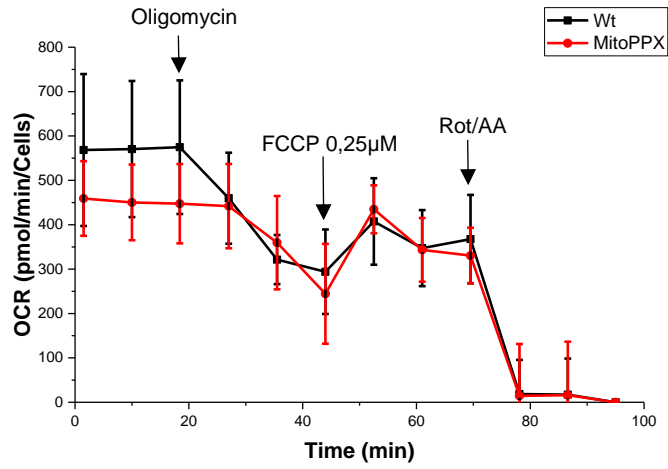

# Supplem. Fig. 4

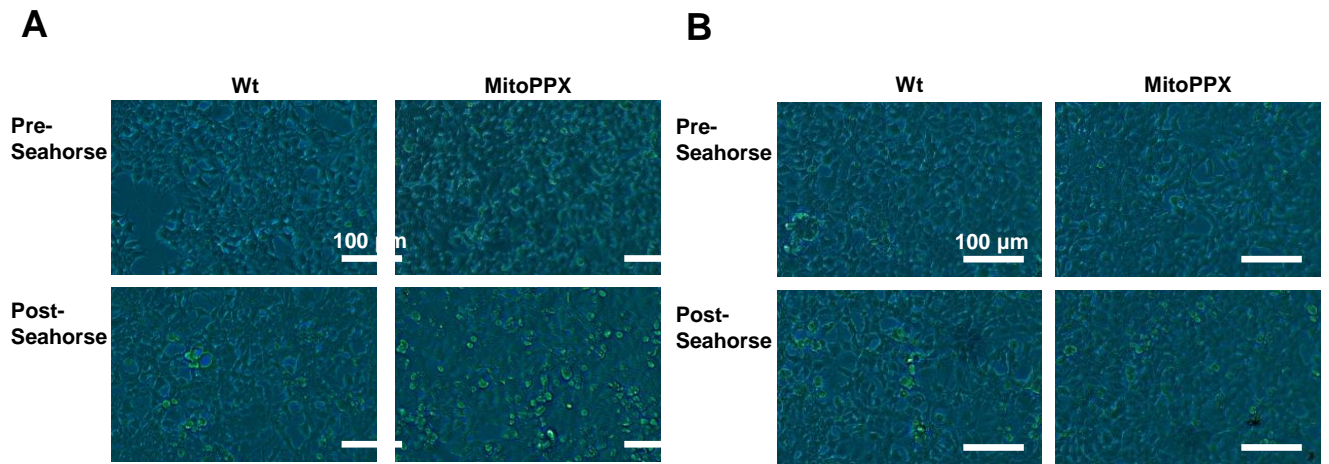

# Supplem. Fig. 5

**A**

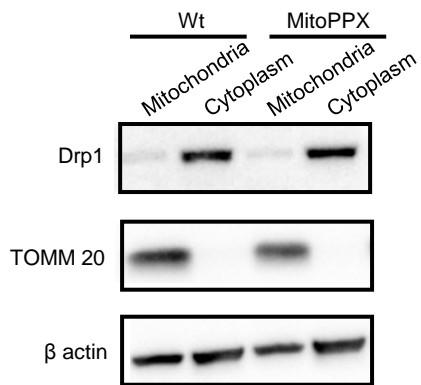

**B**

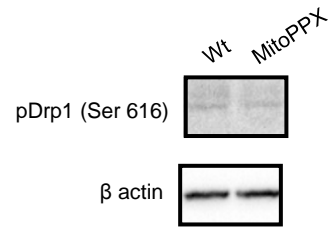

Supplement: NIHMS1700323-supplement-Suppl__Material.pdf [file NIHMS1700323-supplement-Suppl__Material.pdf]
